# Supplementary material
Source: Research Square preprint supplement (doi:10.21203/rs.3.rs-9734762/v1)
Supplement: Supplementary file 1 [file 55347ad4aab8d0651a0b14ce.docx]

**Figure S1.** Flowchart of patient selection.

**
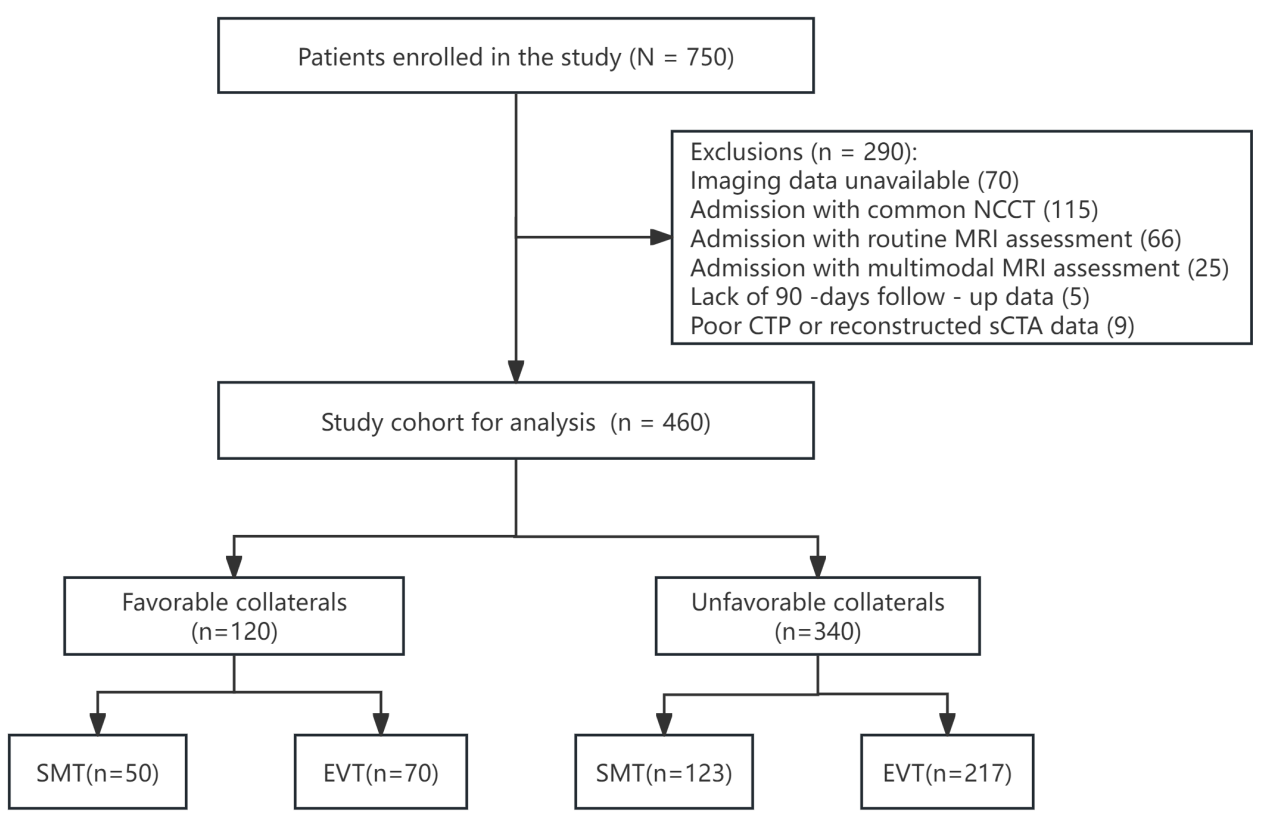
**

Abbreviations: SMT, standard medical therapy; EVT, endovascular therapy; NCCT, noncontrast computed tomography; MRI, magnetic resonance imaging; CTA, computed tomography angiography; CTP, computed tomography perfusion.
